# Supplementary material
Source: PubMed Central journal article supplement (PMC5365728)
Supplement: AAC.02359-16_zac004176009s1.pdf [file AAC.02359-16_zac004176009s1.pdf]

# Supplemental Material

## Supplemental material and methods

### Whole genome sequencing

For next generation sequencing with the Illumina MiSeq (Illumina Netherlands BV, Eindhoven, The Netherlands), whole genome DNA was isolated using the Purelink® Genome DNA Mini kit (Thermo Fischer Scientific, Dreieich, Germany). An Illumina Nextera XT library (Illumina Netherlands BV, Eindhoven, The Netherlands) was produced and sequencing was performed with 2x300 bp paired-end reads. For the Illumina sequencing, 4,597,732 paired-end reads with a mean read length of 175 nt (mean coverage 137x) were obtained. For long-read single-molecule real-time (SMRT) sequencing (Pacific Biosciences, MenloPark, CA), DNA was isolated using the method described by Pitcher et al (1). A SMRTbell™ template library was prepared according to the instructions from Pacific Biosciences, Menlo Park, CA, USA, following the Procedure & Checklist - 10 kb Template Preparation Using BluePippin™ Size-Selection System. Briefly, for the preparation of 15kb libraries 8µg genomic DNA was sheared using g-tubes™ from Covaris, Woburn, MA, USA according to the manufacturer's instructions. DNA was end-repaired and ligated overnight to hairpin adapters applying components from the DNA/Polymerase Binding Kit P6 from Pacific Biosciences, Menlo Park, CA, USA. Reactions were carried out according to the manufacturer's instructions. BluePippin™ Size-Selection to 4000 kb and 15000 kb was performed according to the manufacturer's instructions (Sage Science, Beverly, MA, USA). Conditions for annealing of sequencing primers and binding of polymerase to purified SMRTbell™ template were assessed with the Calculator in RS Remote, Pacific Biosciences, Menlo Park, CA, USA. SMRT sequencing was carried out on the PacBio *RSII* (Pacific Biosciences, Menlo Park, CA, USA) taking one 240-minutes movie for each SMRT cell. In total 3 SMRT cells were run. A total of 198,383 reads with a mean read length of 9,430 nt were generated. Assembly of PacBio reads was performed using

RS\_HGAP\_Assembly.3 included in the SMRT Portal 2.3.0. To obtain a high quality genome sequence, mapping of paired-end reads from Illumina sequencing was performed using Burrows–Wheeler Aligner [BWA, (2)].

## **In-silico analyses**

The multi-locus sequence type of *E. coli* NRZ14408 was identified using MLST 1.8 implementing the scheme of Wirth et al. (3, 4). Serotypes were identified using SeroTypeFinder (9). The insertion sequences were investigated using ISFinder (10) and blastn (<http://blast.ncbi.nlm.nih.gov/Blast.cgi>). Bacteriophages were analyzed using PHAST (11). Plasmidfinder was used to investigate the incompatibility groups of the plasmids (12). Database search for *mcr-1* encoding IncHI2 plasmids was performed using blastn with p14408\_M as a reference (<http://blast.ncbi.nlm.nih.gov/Blast.cgi>; date of database search: 15<sup>th</sup> August 2016). The presence of acquired antibiotic resistance genes and virulence genes was assessed using ResFinder and VirulenceFinder (7, 8). Analysis of operons involved in the iron acquisition was performed using blastn (<http://blast.ncbi.nlm.nih.gov/Blast.cgi>) with the sequences presented in supplementary table S5. For comparative analyses, EasyFig and BRIG were used (5, 6).

*E. coli* of sequence type ST362 were identified using Enterobase (<https://enterobase.warwick.ac.uk/>). The contig sequences of all isolates for which the isolation date was known, were downloaded. In addition, the data from NCTC 3000 Project (Public Health England, <https://www.phe-culturecollections.org.uk/collections/nctc-3000-project.aspx>) was analyzed using the MLST package provided on <https://github.com/tseemann/mlst> for the presence of *E. coli* ST362. One *E. coli* ST362 was identified (*E. coli* NCTC9014; accession number ERS701895; [ftp://ftp.sanger.ac.uk/pub/project/pathogens/NCTC3000/datalinks\\_manual/ERS701895.gff](ftp://ftp.sanger.ac.uk/pub/project/pathogens/NCTC3000/datalinks_manual/ERS701895.gff)).

## Supplementary Tables

Supplementary Table S1: Properties of the plasmids and phages. <sup>a</sup> not 100% identity on DNA sequence level, <sup>b</sup>two copies are present on different plasmids, <sup>c</sup>two copies present on the same plasmid, n.a. not applicable (no plasmid), n.t.: not typeable using conventional methods (no incompatibility group), MLS= Macrolide, Lincosamide and Streptogramin B. Genes which are marked red are present in two copies on different plasmids.

|                               | Name                  | p14408_M                                                                                                                                        | p14408_1                                                                                                                        | p14408_2                                                                                                                        | phage 1 | phage 2 | p14408_3 |
|-------------------------------|-----------------------|-------------------------------------------------------------------------------------------------------------------------------------------------|---------------------------------------------------------------------------------------------------------------------------------|---------------------------------------------------------------------------------------------------------------------------------|---------|---------|----------|
|                               | Size [bp]             | 238,073                                                                                                                                         | 137,186                                                                                                                         | 88,196                                                                                                                          | 41,305  | 19,226  | 11,988   |
|                               | Incompatibility group | IncHI2                                                                                                                                          | IncFII, IncFIB                                                                                                                  | IncN                                                                                                                            | n.a.    | n.a.    | n.t.     |
| Genes encoding resistance to: | Aminoglycosides       | <i>aac(3)-IIa</i> ,<br><i>aadA1</i> ,<br><i>aadA2</i> ,<br><i>aph(3')-Ic<sup>a</sup></i> ,<br><i>strA<sup>b</sup></i> , <i>strB<sup>b</sup></i> | <i>aac(3)-IIa<sup>b</sup></i>                                                                                                   | <i>aac(3)-IIa<sup>b</sup></i> ,<br><i>strA<sup>b</sup></i> , <i>strB<sup>b</sup></i>                                            |         |         |          |
|                               | Beta-lactams          | <i>bla<sub>TEM-1A</sub></i>                                                                                                                     | <i>bla<sub>KPC-2</sub><sup>b</sup></i> ,<br><i>bla<sub>OXA-1</sub><sup>b</sup></i> ,<br><i>bla<sub>TEM-1B</sub><sup>b</sup></i> | <i>bla<sub>KPC-2</sub><sup>b</sup></i> ,<br><i>bla<sub>OXA-1</sub><sup>b</sup></i> ,<br><i>bla<sub>TEM-1B</sub><sup>b</sup></i> |         |         |          |
|                               | Colistin              | <i>mcr-1</i>                                                                                                                                    |                                                                                                                                 |                                                                                                                                 |         |         |          |
|                               | Fluoroquinolones      |                                                                                                                                                 | <i>aac(6')Ib-cr<sup>b</sup></i>                                                                                                 | <i>aac(6')Ib-cr<sup>b</sup></i> ,<br><i>qnrB2</i>                                                                               |         |         |          |
|                               | MLS                   |                                                                                                                                                 | <i>mph(A)<sup>b</sup></i>                                                                                                       | <i>mph(A)<sup>b</sup></i>                                                                                                       |         |         |          |
|                               | Phenicol              | <i>cmlA1</i>                                                                                                                                    | <i>catA1</i> ,<br><i>catB3<sup>b</sup></i>                                                                                      | <i>catB3<sup>b</sup></i>                                                                                                        |         |         |          |
|                               | Rifampicin            |                                                                                                                                                 | <i>arr-3<sup>b</sup></i>                                                                                                        | <i>arr-3<sup>b</sup></i>                                                                                                        |         |         |          |
|                               | Sulphonamides         | <i>sul3</i>                                                                                                                                     | <i>sul1<sup>b</sup></i>                                                                                                         | <i>sul1<sup>b,c</sup></i>                                                                                                       |         |         |          |
|                               | Tetracyclines         | <i>tet(A)</i>                                                                                                                                   |                                                                                                                                 |                                                                                                                                 |         |         |          |
| Trimethoprim                  |                       |                                                                                                                                                 | <i>dfrA18</i>                                                                                                                   |                                                                                                                                 |         |         |          |

Supplementary Table S2: Distribution of antibiotic resistance genes among the plasmids p14408\_M, pHNSHP45-2, pSA26-MCR-1 and pS38. All genes depict an identity of >95% and >98% coverage, unless stated differently. <sup>a</sup>1x 100% coverage, second truncated (75%) MLS= Macrolide, Lincosamide and Streptogramin B

| plasmid     | Aminoglycoside |               |               |             |             |                   |                   |                   |                  |                   | Beta-lactam                 |                             |                              |                               | Colistin     | Fluoroquinolone |             | Fosfomycin  | MLS           |                | Phenicol     |             |            | Sulphonamide |             |             | Tetracycline  | Trimethoprim |               |               |
|-------------|----------------|---------------|---------------|-------------|-------------|-------------------|-------------------|-------------------|------------------|-------------------|-----------------------------|-----------------------------|------------------------------|-------------------------------|--------------|-----------------|-------------|-------------|---------------|----------------|--------------|-------------|------------|--------------|-------------|-------------|---------------|--------------|---------------|---------------|
|             | <i>aadA2</i>   | <i>aadA1a</i> | <i>aadA1b</i> | <i>strA</i> | <i>strB</i> | <i>aph(3')-Ia</i> | <i>aph(3')-Ic</i> | <i>aac(3)-IIa</i> | <i>aph(4)-Ia</i> | <i>aac(3)-IVa</i> | <i>bla<sup>TEM-1B</sup></i> | <i>bla<sup>TEM-1A</sup></i> | <i>bla<sup>CTX-M-1</sup></i> | <i>bla<sup>CTX-M-14</sup></i> | <i>mcr-1</i> | <i>oxyB</i>     | <i>oxyA</i> | <i>fosA</i> | <i>mph(A)</i> | <i>meff(B)</i> | <i>cmiA1</i> | <i>floR</i> | <i>cmi</i> | <i>sul3</i>  | <i>sul1</i> | <i>sul2</i> | <i>tet(A)</i> | <i>dfrA1</i> | <i>dfrA12</i> | <i>dfrA14</i> |
| p14408_M1   | +              | +             |               | +           | +           |                   | +                 | +                 |                  |                   |                             | +                           |                              | +                             |              |                 |             |             |               | +              |              |             | +          |              | +           | +           |               |              | +             |               |
| pSA26-MCR-1 | +              | +             |               | +           | +           | +                 |                   |                   |                  |                   | +                           |                             |                              |                               | +            |                 |             | +           |               |                |              | +           | +          | +            |             | +           |               |              |               | +             |
| pHNSHP45-2  | <sup>a</sup>   | +             |               |             |             | +                 |                   |                   | +                | +                 |                             |                             | +                            | +                             | +            | +               | +           |             |               | +              | +            |             | +          | +            | +           |             |               | +            |               |               |
| pS38        | +              | +             | +             |             |             |                   |                   |                   |                  |                   |                             | +                           |                              |                               |              |                 |             |             | +             |                |              |             | +          | +            |             | +           | +             |              |               |               |

Supplementary Table S3: Virulence genes present in the chromosome of *E. coli* NRZ14408. <sup>a</sup>*astA* was present in twelve copies, <sup>b</sup> present in two copies. n.a.: not applicable. The iron metabolism operons were identified using blastn and the references presented in Supplementary Table S3, the virulence genes were assessed using VirulenceFinder (8).

| Genes                                           | Operon                              | Function                 | category         | NRZ14408       |
|-------------------------------------------------|-------------------------------------|--------------------------|------------------|----------------|
| <i>astA</i>                                     | n.a.                                | Toxin                    | not known        | + <sup>a</sup> |
| <i>iha</i>                                      | n.a.                                | Adherence                | Adherence        | +              |
| <i>gad</i>                                      | n.a.                                | Acid resistance          | Acid resistance  | + <sup>b</sup> |
| <i>air, eilA</i>                                | <i>selC</i> -B pathogenicity island | Adherence                | Adherence        | +              |
| <i>iss</i>                                      | n.a.                                | Serum resistance         | Serum resistance | +              |
| <i>chuA, chuS, chuT, chuU, chuW, chuX, chuY</i> | <i>chu</i>                          | Hemin uptake system      | Iron metabolism  | +              |
| <i>iucA, iucB, iucC, iucD, iutA</i>             | aerobactin                          | Aerobactin               | Iron metabolism  | +              |
| <i>fhuA, fhuB, fhuC, fhuD</i>                   | <i>fhu</i>                          | ferrichrome uptake DH10B | Iron metabolism  | +              |
| <i>feoA, feoB, feoC</i>                         | <i>feo</i>                          | ferrous iron uptake      | Iron metabolism  | +              |

Supplementary Table S4: Properties of additional *E. coli* ST362 included into the study. AB, antibiotic

| Isolate           | Accession number | AB-resistance genes? | Source    | Collection Year | Country        | Serotype | No. of virulence genes | Beta-Lactamase Genes                                                                           |
|-------------------|------------------|----------------------|-----------|-----------------|----------------|----------|------------------------|------------------------------------------------------------------------------------------------|
| NCTC9014          | ERS701895        | no                   | Human     | 1952            | Denmark        | :H6      | 6                      | None                                                                                           |
| MOD1-EC6899       | SRS1529503       | yes                  | Livestock | 1975            | unknown        | O7:H6    | 10                     | No beta-lactamase                                                                              |
| MOD1-EC5512       | SRS1594124       | yes                  | Livestock | 1976            | United States  | O7:H6    | 10                     | <i>bla</i> <sub>TEM-1B</sub>                                                                   |
| MOD1-EC5501       | SRS1594118       | yes                  | Human     | 1992            | India          | O7:H6    | 11                     | <i>bla</i> <sub>OXA-1</sub>                                                                    |
| MOD1-EC5465       | SRS1594016       | no                   | Poultry   | 1993            | United States  | O7:H6    | 6                      | None                                                                                           |
| MOD1-EC6950       | SRS1590224       | yes                  | Livestock | 1997            | United States  | O15:H1   | 9                      | <i>bla</i> <sub>TEM-1B</sub>                                                                   |
| HVH 6 (3-8296502) | SRS402207        | yes                  | Human     | 2004            | Denmark        | O86:H28  | 12                     | <i>bla</i> <sub>TEM-1B</sub>                                                                   |
| HICF113           | SRS1221335       | yes                  | Human     | 2010            | United Kingdom | O7:H6    | 5                      | <i>bla</i> <sub>CTX-M-15</sub> , <i>bla</i> <sub>OXA-1</sub> ,<br><i>bla</i> <sub>TEM-1B</sub> |
| KTE78             | SRS410376        | no                   | Human     | 2010            | Denmark        | O7:H6    | 4                      | None                                                                                           |
| KTE79             | SRS410371        | no                   | Human     | 2010            | Denmark        | O7:H6    | 4                      | None                                                                                           |
| AZ_TG77018        | SRS876455        | yes                  | Poultry   | 2014            | United States  | O7:H6    | 13                     | No beta-lactamase                                                                              |
| AZ_TG77102        | SRS893459        | yes                  | Poultry   | 2014            | United States  | O15:H1   | 14                     | <i>bla</i> <sub>TEM-1B</sub>                                                                   |
| sam_103239        | ERS1164728       | yes                  | Livestock | 2014            | Denmark        | O11:H9   | 9                      | <i>bla</i> <sub>CTX-M-1</sub> , <i>bla</i> <sub>TEM-1B</sub>                                   |

Supplementary Table S5: Iron acquisition operons investigated in the study

| Operon         | function                                      | Source                                         | Database accession number | position        | length   |
|----------------|-----------------------------------------------|------------------------------------------------|---------------------------|-----------------|----------|
| <i>fhu</i>     | ferrichrome uptake                            | <i>Escherichia coli</i> str. K12 substr. DH10B | CP000948.1                | 141588-147548   | 5961 bp  |
| <i>fhu</i>     | ferrichrome uptake                            | <i>Escherichia coli</i> APEC O78               | CP004009.1                | 869099-875005   | 5907 bp  |
| <i>feo</i>     | Ferrous iron uptake                           | <i>Escherichia coli</i> CFT073                 | AE014075.1                | 3967027-3969592 | 2566 bp  |
| <i>chu</i>     | heme iron-utilization                         | <i>Escherichia coli</i> CFT073                 | AE014075.1                | 4084996-4093181 | 8186 bp  |
| aerobactin     | iron acquisition                              | Plasmid pAPEC-O2-ColV                          | NC_007675.1               | 98089-106117    | 8029 bp  |
| salmochelin    | iron acquisition                              | Plasmid pAPEC-O2-ColV                          | NC_007675.1               | 141336-150894   | 9559 bp  |
| yersiniabactin | iron acquisition                              | <i>Yersinia pestis</i> CO92 chromosome         | NC_003143.1               | 2140840-2169669 | 28830 bp |
| <i>sit</i>     | iron ABC transport system (Fe <sup>2+</sup> ) | Plasmid pAPEC-O1-ColBM                         | DQ381420.1                | 152749-156198   | 3450bp   |
| <i>fec</i>     | iron(III) dicitrate ABC transporter           | Plasmid pKPN_CZ                                | NC_019390.1               | 22157-29701     | 7545 bp  |
| <i>eit</i>     | putative ABC iron transport system            | Plasmid pAPEC-O2-ColV                          | NC_007675.1               | 176416-180456   | 4041 bp  |
| <i>ets</i>     | putative ABC iron transport system            | Plasmid pAPEC-O2-ColV                          | NC_007675.1               | 119488-123176   | 3689 bp  |
| no name        | putative ABC iron transport system            | Plasmid pEC14_114                              | GQ398086.1                | 6106-13149      | 7044 bp  |

p14408\_1  
(IncFIB)

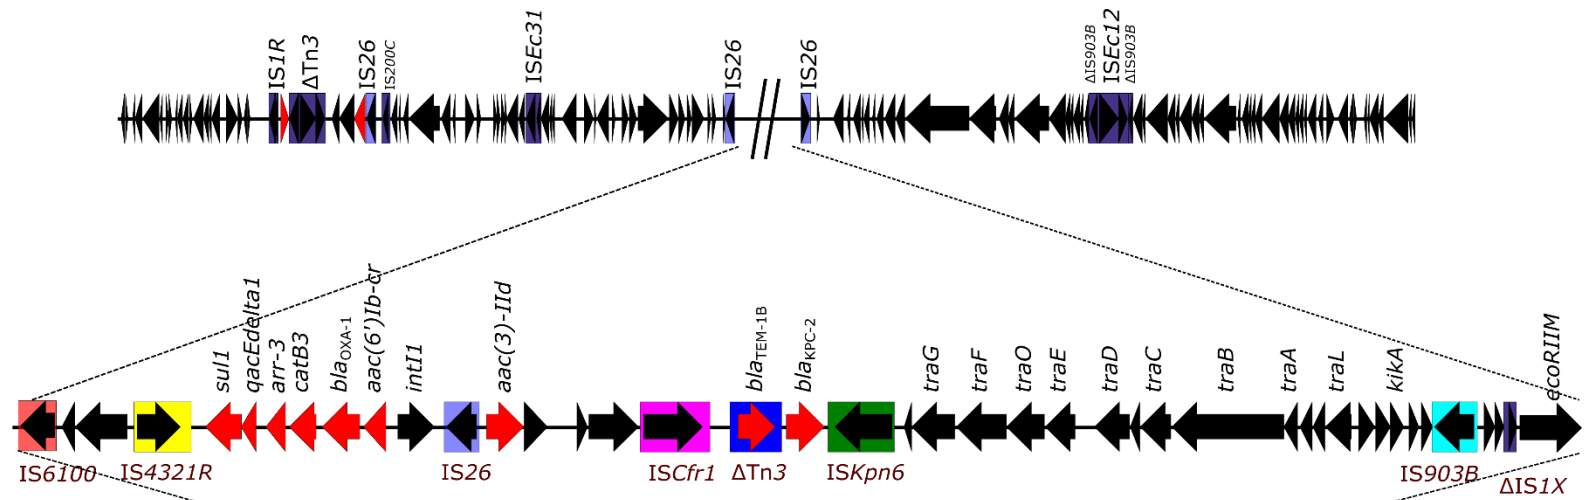

p14408\_2  
(IncN)

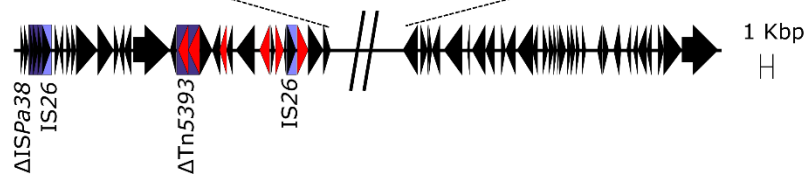

Supplementary Figure S1: Comparison of the *bla*<sub>KPC-2</sub> encoding plasmids of *E. coli* NRZ14408.





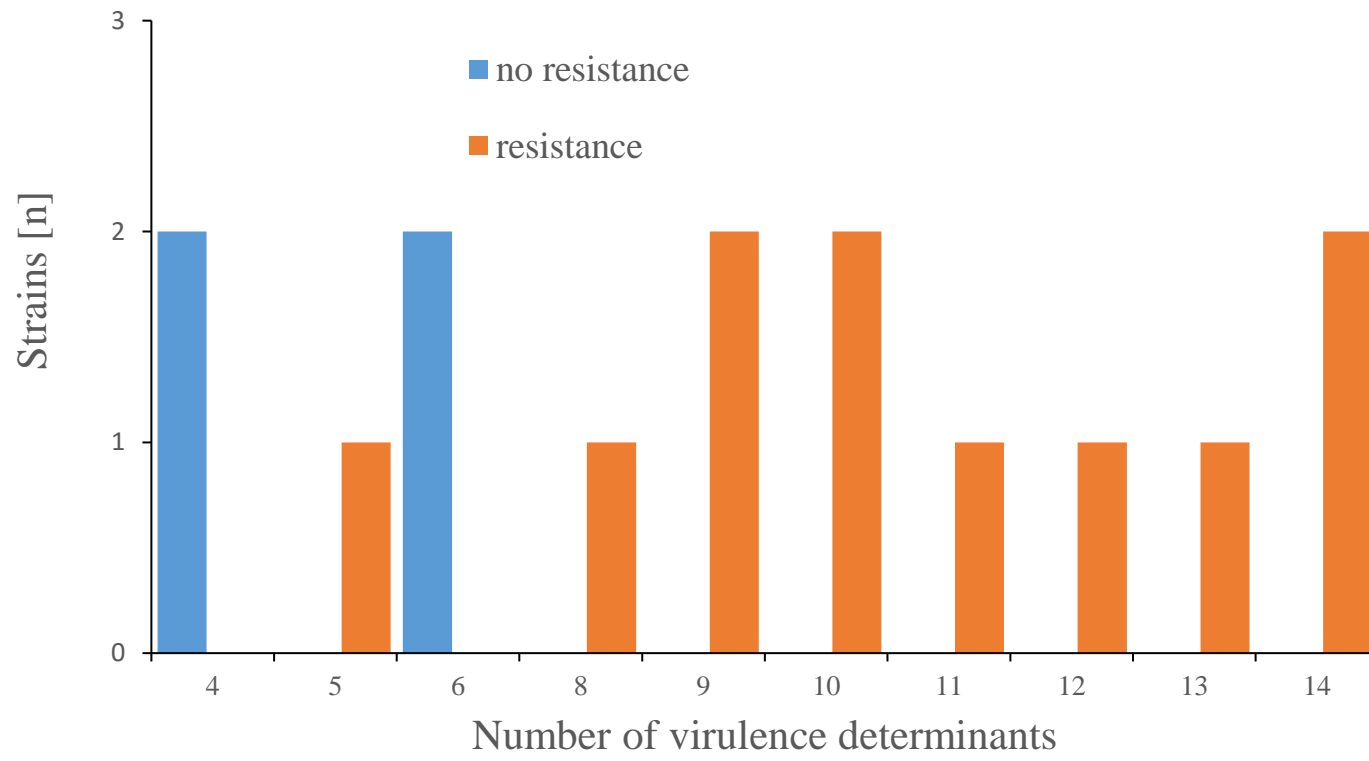

Supplementary Figure S3: Number of virulence determinants per isolate subdivided according to isolates harboring antibiotic resistance genes and those not harboring those.

## Supplementary References

1. **Pitcher DG, Saunders NA, Owen RJ.** 1989. Rapid extraction of bacterial genomic DNA with guanidium thiocyanate. *Lett Appl Microbiol* **8**:151–156.
2. **Li H, Durbin R.** 2009. Fast and accurate short read alignment with Burrows-Wheeler transform. *Bioinformatics* **25**:1754–1760.
3. **Wirth T, Falush D, Lan R, Colles F, Mensa P, Wieler LH, Karch H, Reeves PR, Maiden MCJ, Ochman H, Achtman M.** 2006. Sex and virulence in *Escherichia coli*: an evolutionary perspective. *Mol Microbiol* **60**:1136–51.
4. **Larsen M V., Cosentino S, Rasmussen S, Friis C, Hasman H, Marvig RL, Jelsbak L, Sicheritz-Pontén T, Ussery DW, Aarestrup FM, Lund O.** 2012. Multilocus sequence typing of total-genome-sequenced bacteria. *J Clin Microbiol* **50**:1355–1361.
5. **Sullivan MJ, Petty NK, Beatson SA.** 2011. Easyfig: a genome comparison visualizer. *Bioinformatics* **27**:1009–10.
6. **Alikhan N-F, Petty NK, Ben Zakour NL, Beatson SA.** 2011. BLAST Ring Image Generator (BRIG): simple prokaryote genome comparisons. *BMC Genomics* **12**:402.
7. **Zankari E, Hasman H, Cosentino S, Vestergaard M, Rasmussen S, Lund O, Aarestrup FM, Larsen MV.** 2012. Identification of acquired antimicrobial resistance genes. *J Antimicrob Chemother* **67**:2640–2644.
8. **Joensen KG, Scheutz F, Lund O, Hasman H, Kaas RS, Nielsen EM, Aarestrup FM.** 2014. Real-time whole-genome sequencing for routine typing, surveillance, and outbreak detection of verotoxigenic *Escherichia coli*. *J Clin Microbiol* **52**:1501–10.
9. **Joensen KG, Tetzschner AMM, Iguchi A, Aarestrup FM, Scheutz F.** 2015. Rapid and easy in silico serotyping of *Escherichia coli* isolates by use of whole-genome sequencing data. *J Clin Microbiol* **53**:2410–26.

10. **Siguier P, Perochon J, Lestrade L, Mahillon J, Chandler M.** 2006. ISfinder: the reference centre for bacterial insertion sequences. *Nucleic Acids Res* **34**:D32-6.
11. **Zhou Y, Liang Y, Lynch KH, Dennis JJ, Wishart DS.** 2011. PHAST: a fast phage search tool. *Nucleic Acids Res* **39**:W347-52.
12. **Carattoli A, Zankari E, García-Fernández A, Voldby Larsen M, Lund O, Villa L, Møller Aarestrup F, Hasman H.** 2014. In silico detection and typing of plasmids using PlasmidFinder and plasmid multilocus sequence typing. *Antimicrob Agents Chemother* **58**:3895–903.
